# Supplementary material for: Assessing inter-annual variability in nitrogen sourcing and retentionthrough hybrid Bayesian watershed modeling
Source: Copernicus journal article supplement (doi:10.5194/hess-2021-52), 2021-02-09
Supplement: Supplementary file 1 [file hess-2021-52-supplement.pdf]

# Assessing inter-annual variability in nitrogen sourcing and retention through hybrid Bayesian watershed modeling

Jonathan W. Miller, Kimia Karimi, A. Sankarasubramanian, and Daniel R. Obenour

Department of Civil, Construction and Environmental Engineering (Miller, Sankarasubramanian, Obenour) and Department of Geospatial Analytics (Karimi), North Carolina State University

## SUPPORTING INFORMATION

|                                                                                            |         |
|--------------------------------------------------------------------------------------------|---------|
| <b>Figure S1-</b> TN yearly loadings from major WWTPs.....                                 | Page 2  |
| <b>Figure S2-</b> Box and whisker plots of yearly precipitation .....                      | Page 3  |
| <b>Figure S3-</b> Power relationship quantifying uncertainty of TN loadings.....           | Page 4  |
| <b>Figure S4-</b> WRTDS loads for additional LMSs.....                                     | Page 5  |
| <b>Figure S5-</b> Watershed-level random effects for each incremental watershed.....       | Page 6  |
| <b>Figure S6-</b> Major geologic regions in JL and FL region.....                          | Page 7  |
| <b>Figure S7-</b> Model residuals plotted by year .....                                    | Page 8  |
| <b>Figure S8-</b> Predicted vs. Observed plots with and without random effects.....        | Page 9  |
| <b>Table S1-</b> Yearly TN loads and discharge for major and minor WWTPs. ....             | Page 10 |
| <b>Table S2-</b> LMS sites where WRTDS estimates were calculated using a break.....        | Page 12 |
| <b>Table S3-</b> Prior and hierarchical distributions for watershed model parameters ..... | Page 13 |
| <b>Table S4-</b> JL and FL loadings during normal, low, and high precipitation years.....  | Page 14 |

# FIGURES

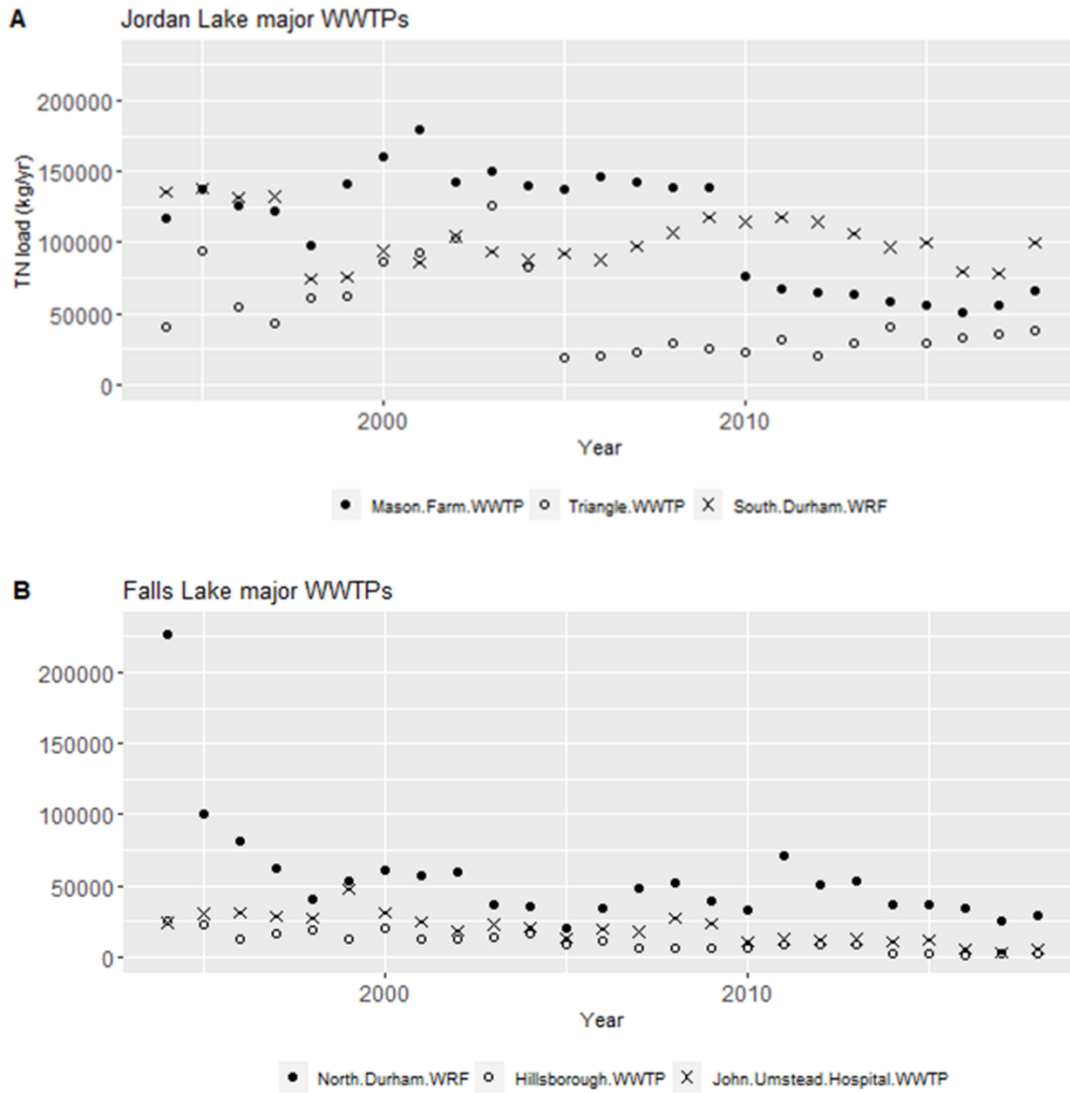

**Figure S1:** Yearly TN loadings from major WWTPs located closest to Jordan and Falls Lake.

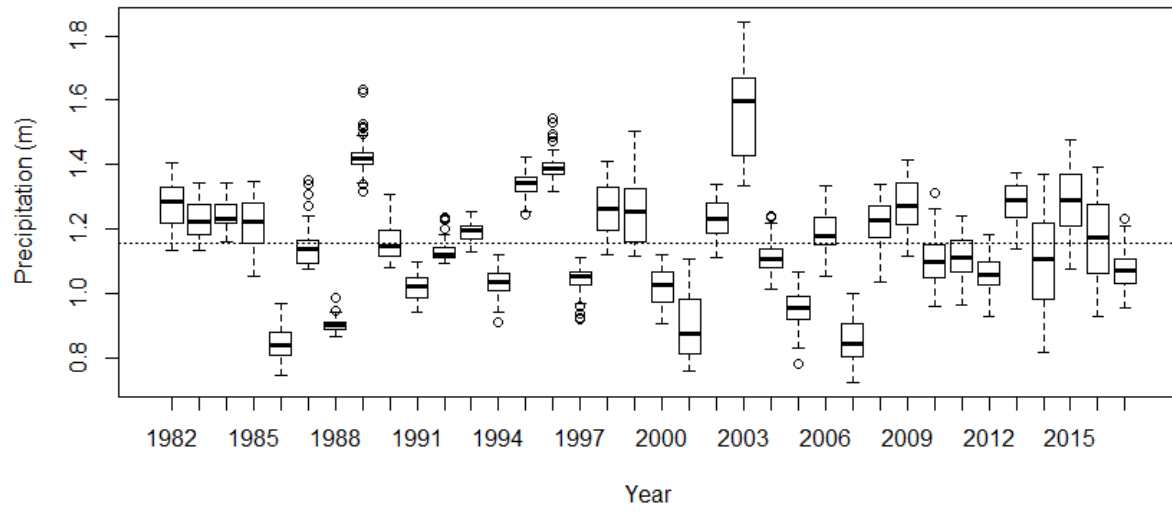

**Figure S2:** Box and whisker plots of yearly precipitation. The dashed line represents mean yearly precipitation for the JL and FL watersheds.

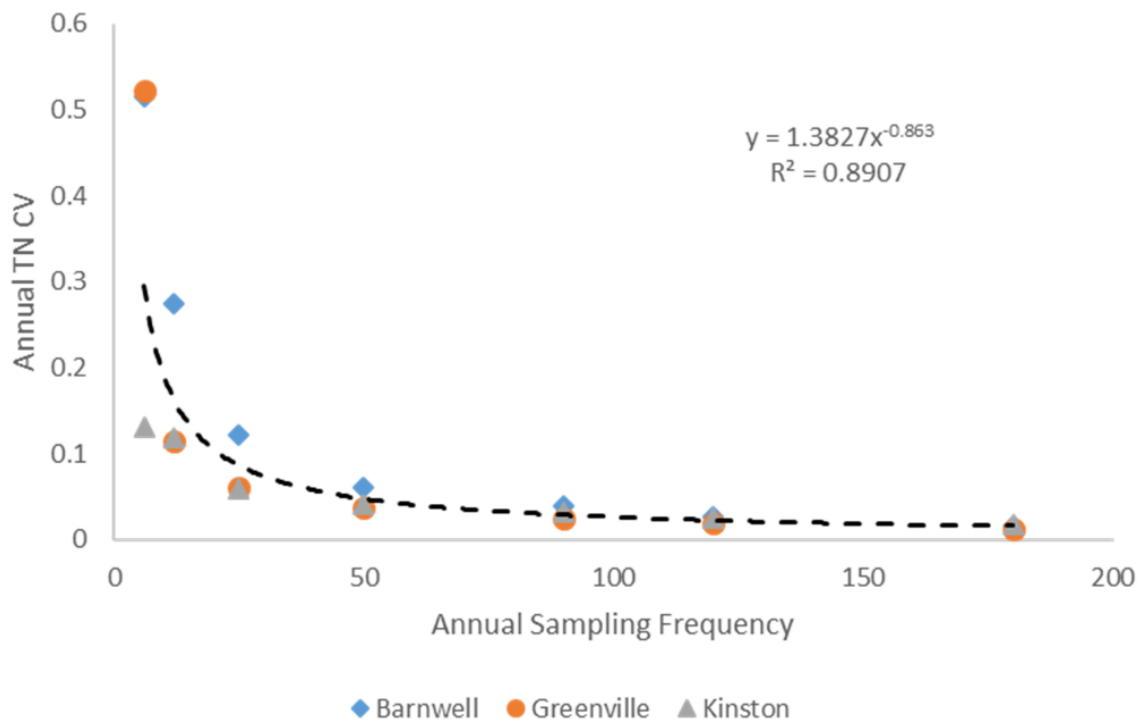

**Figure S3:** Power relationship quantifying the uncertainty (i.e., coefficient of variation (CV)) of TN yearly (Weighted Regression on Time Discharge and Season) loadings based on the number of water quality samples available.

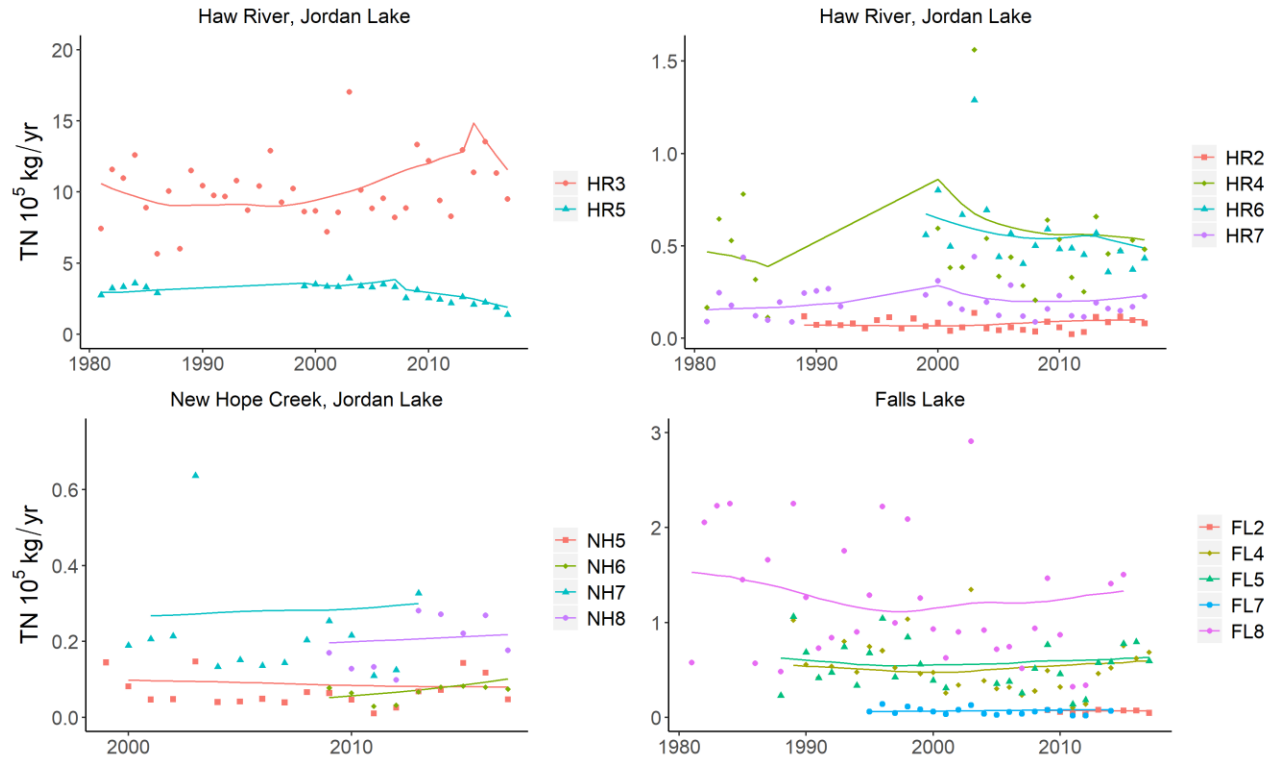

**Figure S4:** WRTDS loads for additional LMSs that are located upstream of LMSs that drain directly into Jordan and Falls Lake (Fig. 3).

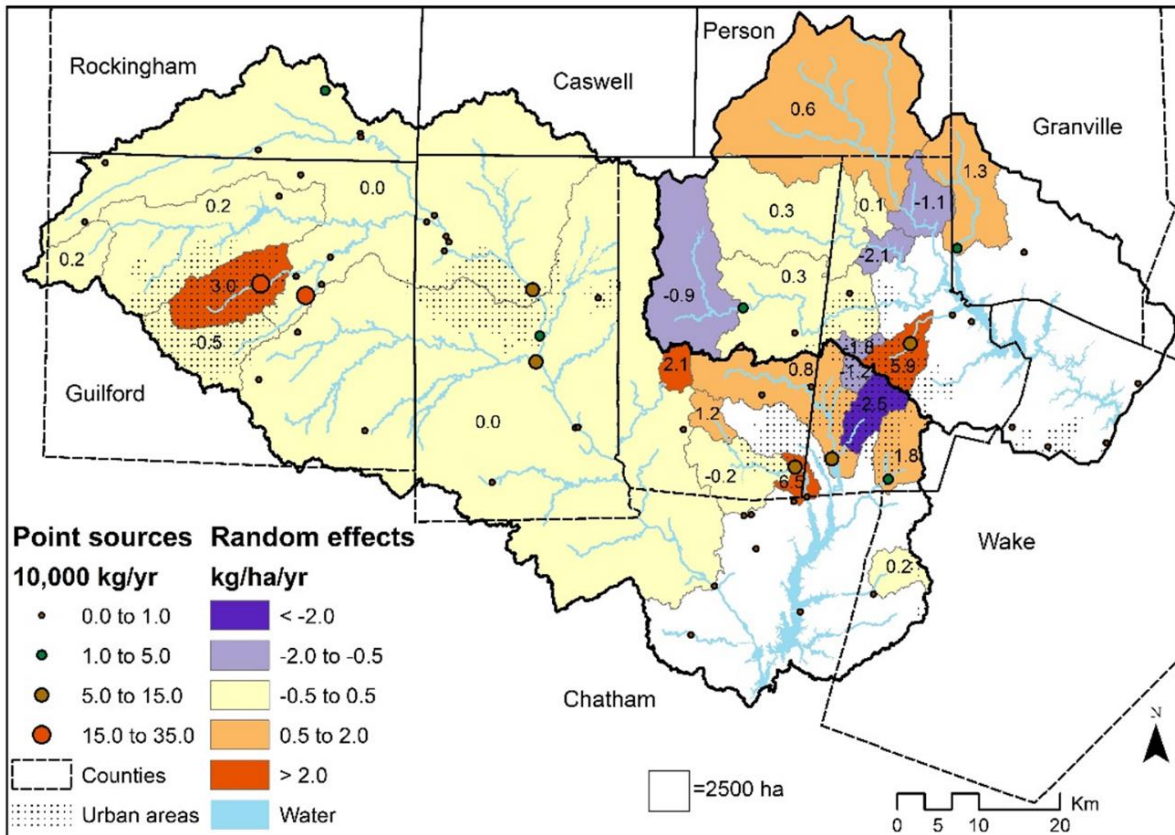

**Figure S5:** Area-normalized watershed-level random effects for each incremental watershed (i.e., load monitoring site watershed)

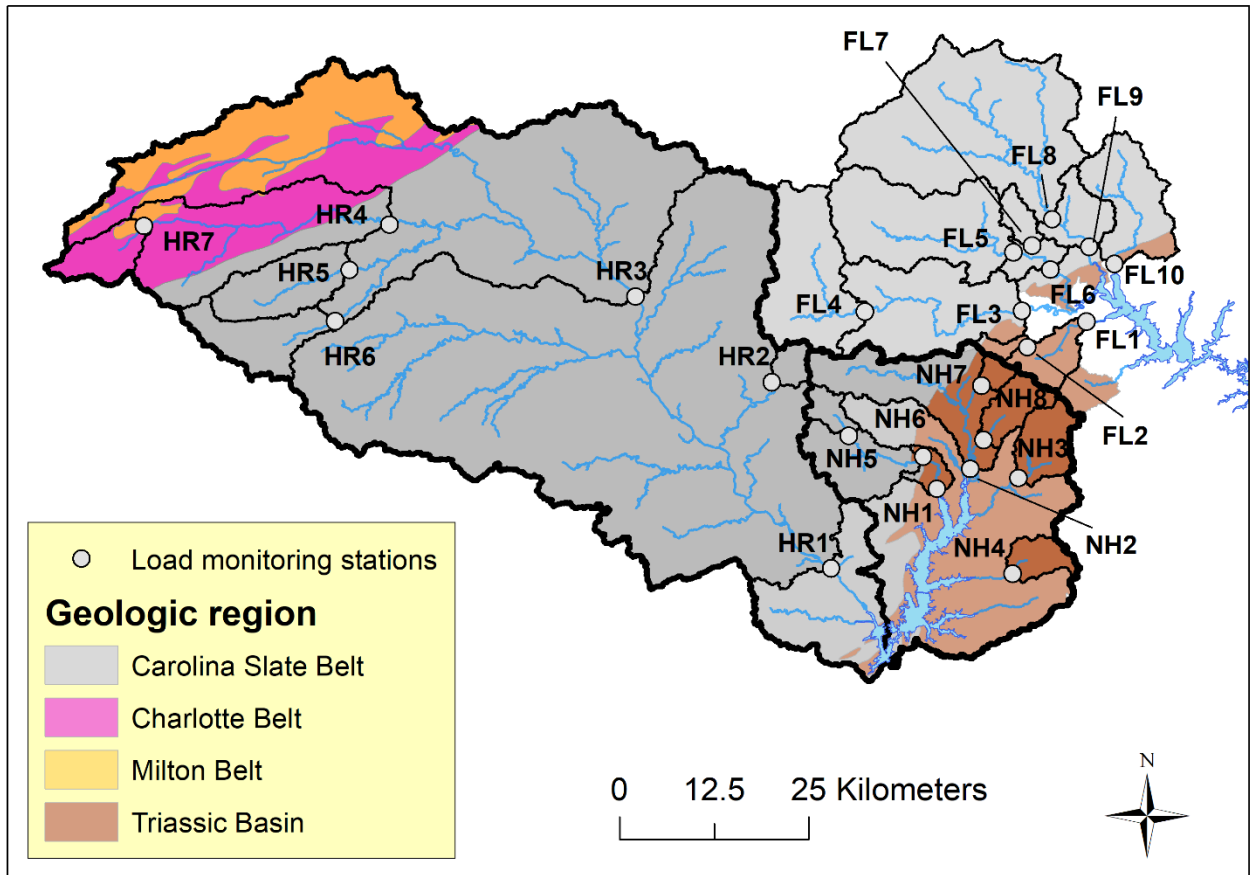

**Figure S6:** Major geologic regions in JL and FL region.

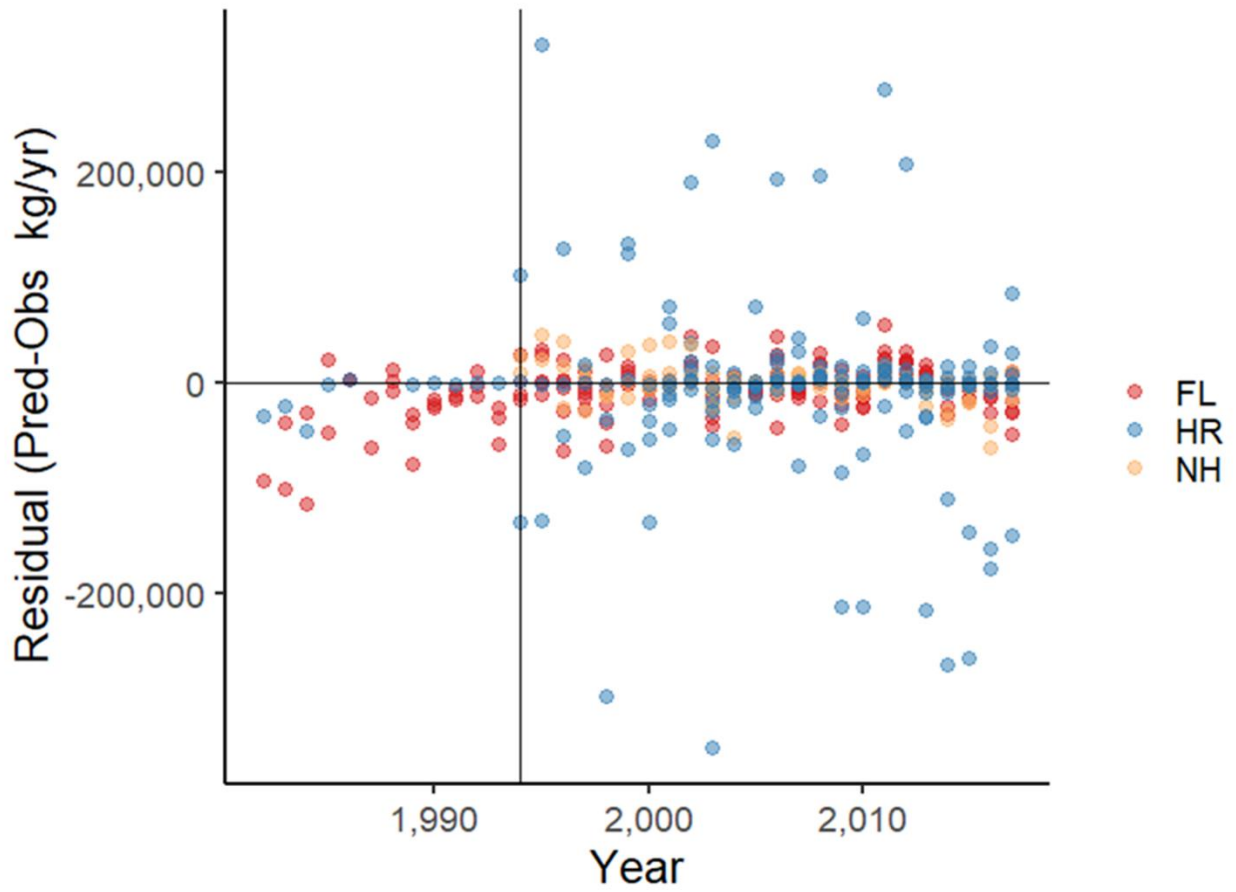

**Figure S7:** Model residuals plotted by year. Load monitoring sites with major point source dischargers were not included before 1994 (solid vertical line).



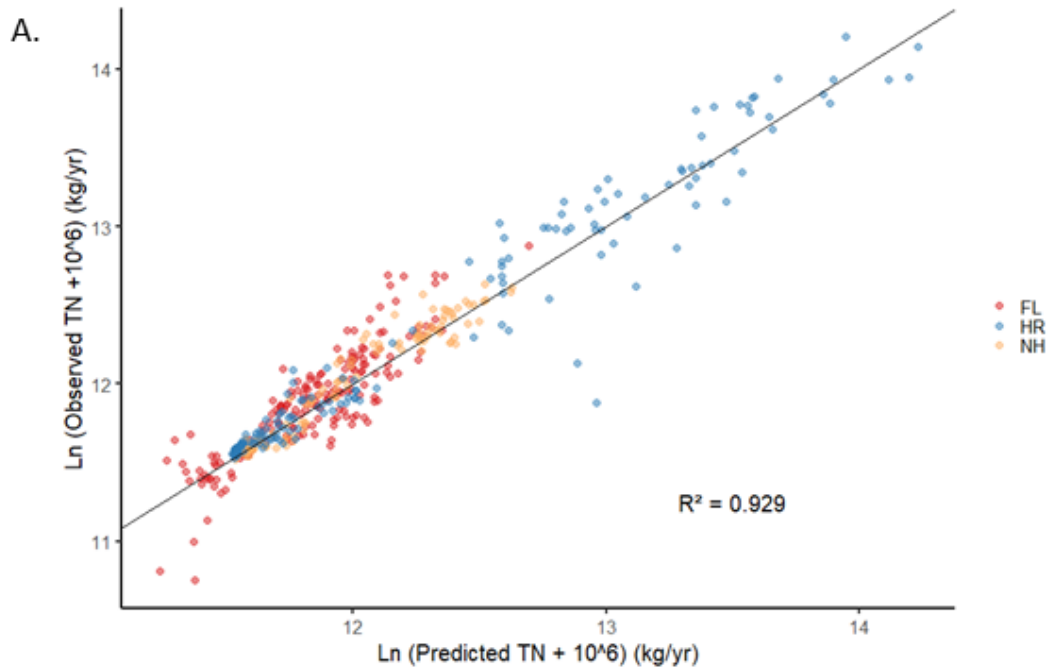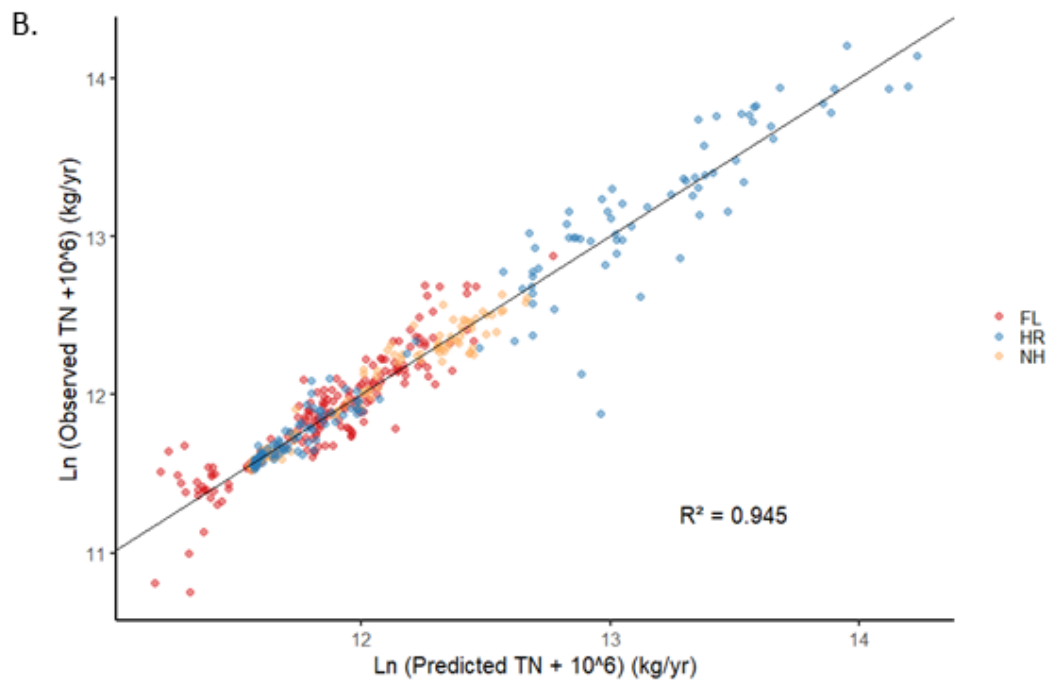

**Figure S8:** Predicted vs. Observed plots without (A) and with (B) watershed-level random effects

## TABLES

**Table S1:** Point source TN loads, flows, and residence time to downstream loading monitoring sites for major and minor point source dischargers.

| NC DEQ ID# | Name                               | TN load (kg) (2017) | Discharge (MGD) (2017) | Downstream LMS | Mean RT (days) to LS | Mean HL (m/yr) to LS |
|------------|------------------------------------|---------------------|------------------------|----------------|----------------------|----------------------|
| NC0026824  | John Umstead Hospital WWTP         | 3396                | 1.610                  | FL10           | 0.05                 |                      |
| NC0023841  | North Durham WRF                   | 25,765              | 8.280                  | FL1            | 0.24                 |                      |
| NC0026433  | Hillsborough WWTP                  | 2016                | 0.919                  | FL3            | 1.10                 |                      |
| NC0037869  | Arbor Hills Mobile Home Park       | 18                  | 0.001                  | FL3            | 0.55                 | 312.0                |
| NC0056731  | Grande Oak Subdivision WWTP        | 41                  | 0.002                  | FL3            | 0.20                 | 107.4                |
| NC0023876  | Southside WWTP                     | 43,342              | 5.872                  | HR1            | 1.26                 |                      |
| NC0021211  | Graham WWTP                        | 0                   | 0.000                  | HR1            | 1.30                 |                      |
| NC0021474  | Mebane WWTP                        | 6,177               | 1.269                  | HR1            | 1.76                 | 96.0                 |
| NC0035866  | Bynum WWTP                         | 122                 | 0.006                  | HR1            | 0.02                 |                      |
| NC0042285  | Trails WWTP                        | 485                 | 0.020                  | HR1            | 1.19                 |                      |
| NC0022675  | Birmingham Place                   | 0                   | 0.000                  | HR1            | 2.94                 |                      |
| NC0022098  | Cedar Valley WWTP                  | 126                 | 0.006                  | HR1            | 3.29                 |                      |
| NC0038164  | Nathanael Greene Elem. School WWTP | 0                   | 0.000                  | HR1            | 2.64                 |                      |
| NC0045128  | Sylvan Elementary School           | 172                 | 0.001                  | HR1            | 1.78                 |                      |
| NC0045152  | Jordan Elementary School           | 130                 | 0.002                  | HR1            | 1.08                 |                      |
| NC0042528  | B Everett Jordan 1927 LLC          | 123                 | 0.008                  | HR1            | 1.04                 |                      |
| NC0025241  | Mason Farm WWTP                    | 55,655              | 5.878                  | NH1            | 0.20                 |                      |
| NC0056413  | Carolina Meadows WWTP              | 2115                | 0.148                  | NH1            | 0.01                 |                      |
| NC0047597  | South Durham WRF                   | 78,164              | 8.023                  | NH2            | 0.55                 |                      |
| NC0042803  | Birchwood Mobile Home Park         | 102                 | 0.007                  | NH2            | 1.20                 |                      |
| NC0074446  | Hilltop Mobile Home Park           | 335                 | 0.010                  | NH2            | 1.54                 |                      |
| NC0026051  | Triangle WWTP                      | 35,557              | 4.502                  | NH3            | 0.14                 |                      |

|           |                                     |         |        |     |      |
|-----------|-------------------------------------|---------|--------|-----|------|
| NC0023868 | Eastside WWTP                       | 55,515  | 3.883  | HR3 | 0.04 |
| NC0024881 | Reidsville WWTP                     | 48,902  | 2.280  | HR3 | 1.50 |
| NC0066966 | Quarterstone Farm WWTP              | 1,438   | 0.038  | HR3 | 1.28 |
| NC0046019 | The Summit WWTP                     | 0       | 0.000  | HR3 | 1.76 |
| NC0046809 | Pentecostal Holiness Church         | 19      | 0.000  | HR3 | 1.59 |
| NC0060259 | Willow Oak Mobile Home Park         | 164     | 0.008  | HR3 | 1.14 |
| NC0077968 | Horners Mobile Home Park            | 127     | 0.003  | HR3 | 0.52 |
| NC0045161 | Altamahaw/Ossipee Elementary School | 283     | 0.003  | HR3 | 0.50 |
| NC0045144 | Western Alamance High School        | 478     | 0.006  | HR3 | 0.40 |
| NC0031607 | Western Alamance Middle School      | 0       | 0.000  | HR3 | 0.45 |
| NC0055271 | Shields Mobile Home Park            | 0       | 0.000  | HR3 | 0.41 |
| NC0065412 | Pleasant Ridge WWTP                 | 40      | 0.008  | HR3 | 1.14 |
| NC0073571 | Countryside Manor WWTP              | 300     | 0.008  | HR3 | 2.78 |
| NC0046043 | Oak Ridge Military Academy          | 255     | 0.004  | HR3 | 2.74 |
| NC0022691 | Autumn Forest Manuf. Home Community | 160     | 0.018  | HR4 | 0.44 |
| NC0047384 | T.Z. Osborne WWTP                   | 582,529 | 27.680 | HR3 | 1.55 |
| NC0038172 | McLeansville Middle School WWTP     | 0       | 0.000  | HR3 | 1.55 |
| NC0029726 | Guilford Correctional Center WWTP   | 0       | 0.000  | HR3 | 1.53 |
| NC0024325 | North Buffalo Creek WWTP            | 161,171 | 6.619  | HR5 | 0.29 |

---

**Table S2:** LMS sites where WRTDS estimates were calculated using a break (i.e. wall) in their record due to a large sustained change (> 25% up or down) in an upstream point source load.

| LMS | Name                  | Years of record |           | # of samples |      | Point source |                     |
|-----|-----------------------|-----------------|-----------|--------------|------|--------------|---------------------|
|     |                       | Pre             | Post      | Pre          | Post | Permit       | WWTP                |
| NH1 | Morgan Creek, JL      | 1994-2009       | 2010-2017 | 360          | 228  | NC0025241    | Mason Farm          |
| NH3 | Northeast Creek       | 1995-2004       | 2005-2017 | 108          | 322  | NC0026051    | Triangle            |
| HR3 | Haw River, Burlington | 1994-2013       | 2014-2017 | 223          | 56   | NC0047384    | T.Z. Osborne        |
| HR5 | N. Buffalo Creek      | 1999-2007       | 2008-2017 | 148          | 241  | NC0024325    | North Buffalo Creek |
| FL3 | Eno River, Durham     | 1994-2006       | 2007-2017 | 158          | 217  | NC0026433    | Hillsborough        |

**Table S3:** Prior distributions and hierarchical distributions for watershed model parameters. Note, EC is export coefficient, DC is delivery coefficient, PIC is precipitation impact coefficient, and SD is standard deviation. Priors are normal distributions (N) with mean and standard deviation or uniform distributions with upper and lower bounds.

| Parameter         | Description          | Units           | Prior                            | Source                                       |
|-------------------|----------------------|-----------------|----------------------------------|----------------------------------------------|
| $\beta_{ag}$      | Agriculture EC       | kg/ha/yr        | N(9,7)                           | Dodd et al. 1992                             |
| $\beta_{ur1}$     | Urban type 1 EC      | kg/ha/yr        | N(8,3)                           | Dodd et al. 1992                             |
| $\beta_{ur2}$     | Urban type 2 EC      | kg/ha/yr        | N(8,3)                           | Dodd et al. 1992                             |
| $\beta_{und}$     | Undeveloped EC       | kg/ha/yr        | N(2,2)                           | Dodd et al. 1992                             |
| $\beta_{ch}$      | Chicken EC           | kg/an/yr        | N(0.001,0.0003)                  | Strickling and Obenour 2018                  |
| $\beta_h$         | Hog EC               | kg/an/yr        | N(0.04,0.02)                     | Strickling and Obenour 2018                  |
| $\beta_{cw}$      | Cow EC               | kg/an/yr        | U(0,5)                           | -                                            |
| $\beta_{ps}$      | Point source DC      | -               | N(1,0.10)                        | -                                            |
| $\gamma_{ag}$     | Agriculture PIC      | -               | N( $\mu_\gamma, \sigma_\gamma$ ) | -                                            |
| $\gamma_{ur1}$    | Urban type 1 PIC     | -               | N( $\mu_\gamma, \sigma_\gamma$ ) | -                                            |
| $\gamma_{ur2}$    | Urban type 2 PIC     | -               | N( $\mu_\gamma, \sigma_\gamma$ ) | -                                            |
| $\gamma_{und}$    | Undeveloped PIC      | -               | N( $\mu_\gamma, \sigma_\gamma$ ) | -                                            |
| $\gamma_{ch}$     | Chicken PIC          | -               | N( $\mu_\gamma, \sigma_\gamma$ ) | -                                            |
| $\gamma_h$        | Hog PIC              | -               | N( $\mu_\gamma, \sigma_\gamma$ ) | -                                            |
| $\gamma_{cw}$     | Cow PIC              | -               | N( $\mu_\gamma, \sigma_\gamma$ ) | -                                            |
| $\gamma_{ret}$    | Retention rate PIC   | -               | N(0,1)                           | -                                            |
| $\kappa$          | Stream decay rate    | d <sup>-1</sup> | N(0.14,0.05)                     | Hoos and McHahon 2009,<br>Garcia et al. 2011 |
| $\omega$          | Reservoir loss rate  | m/yr            | N(11,2)                          | Hoos and McHahon 2009,<br>Garcia et al. 2011 |
| $\sigma_\epsilon$ | Model residual SD    | kg/yr           | U(0,1x10 <sup>6</sup> )          | -                                            |
| $\sigma_{LMS}$    | LMS random effect SD | kg/yr           | U(0,1x10 <sup>6</sup> )          | -                                            |
| $\mu_\gamma$      | PIC mean             | -               | N(1,1)                           | -                                            |
| $\sigma_\gamma$   | PIC SD               | -               | N(0,1)                           | -                                            |

**Table S4:** Percent of nutrient sources that contributes to downstream reservoirs for normal precipitation years (i.e., middle third of years based on precipitation). In parenthesis are nutrient sources during low (lower 33%) and high precipitation years (upper 67%), respectively. Haw River (HR) and New Hope (NH) watersheds of Jordan Lake and Falls Lake (FL).

| Nutrient source  | % TN       |            |            |
|------------------|------------|------------|------------|
|                  | HR         | NH         | FL         |
| Agriculture      | 17 (11,25) | 1 (1,2)    | 30(21,37)  |
| Urban, pre-1980  | 18 (18,17) | 6 (6,5)    | 30 (34,25) |
| Urban, post-1980 | 2 (1,1)    | 2 (1,1)    | 5 (4,4)    |
| Undeveloped      | 6 (5,7)    | 2 (2,2)    | 19 (16,19) |
| Livestock        | 2 (2,2)    | 0 (0,0)    | 1 (2,2)    |
| Discharger       | 33 (40,28) | 11 (15,10) | 14 (24,13) |
